# Supplementary material
Source: PubMed Central journal article supplement (PMC6207933)
Supplement: NIHMS982871-supplement-1.pdf [file NIHMS982871-supplement-1.pdf]

Supplementary Section

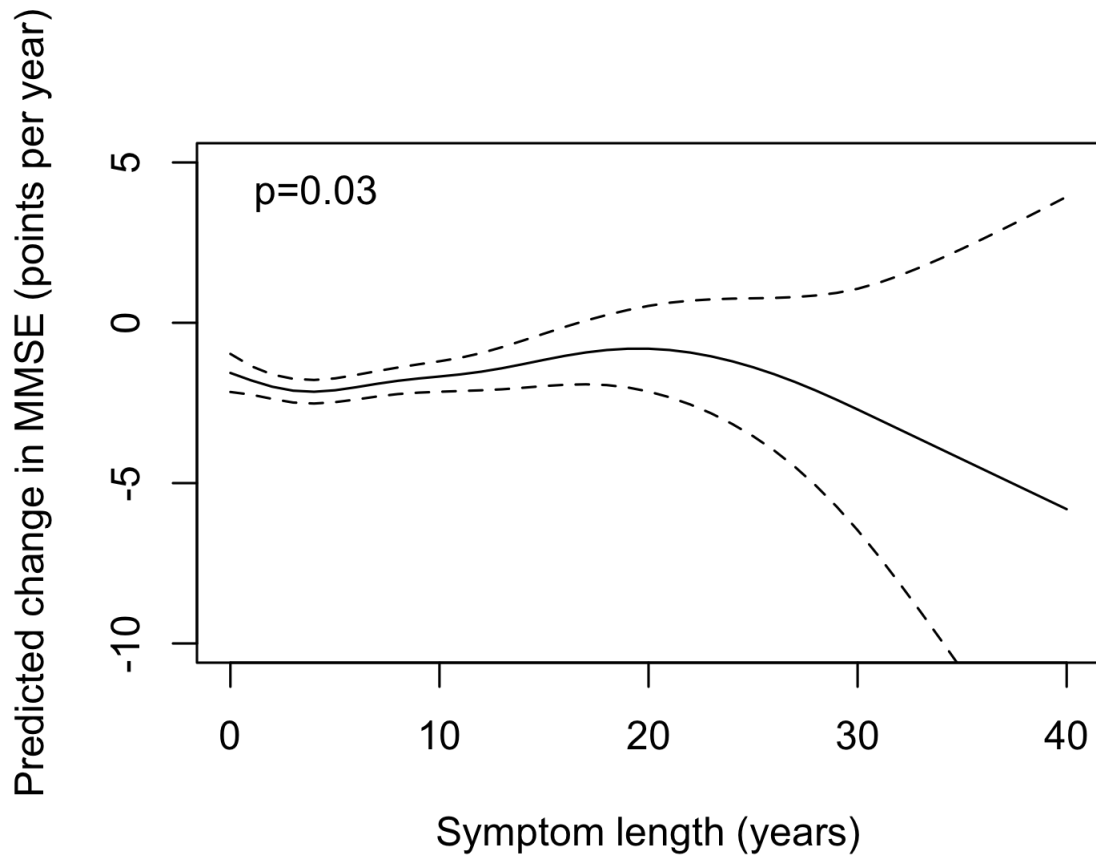

Supplementary figure 1: Plot of predicted change in MMSE (points per year) with 95% pointwise confidence intervals by symptom length. Predictions are for a female subject, with 14 years of education, an MMSE at presentation of 20 and one APOE  $\epsilon 4$  allele.

|                       | Predictor(s) of interest in main results section, years | Outcome                                                                   |                                                                        |
|-----------------------|---------------------------------------------------------|---------------------------------------------------------------------------|------------------------------------------------------------------------|
|                       |                                                         | MMSE                                                                      | CDR                                                                    |
| Longitudinal analyses | Age at presentation                                     | Gender: -0.12<br>[0.12], p=0.3<br><br>Education: -0.05<br>[0.02], p=0.004 | Gender: 0.11[0.07],<br>p=0.1<br><br>Education: 0.02<br>[0.01], p=0.02  |
|                       | Age of onset                                            | Gender: -0.13<br>[0.12], p=0.3<br><br>Education: -0.05<br>[0.02], p=0.004 | Gender: 0.12<br>[0.07], p=0.1<br><br>Education: 0.02<br>[0.01], p=0.02 |
|                       | Symptom length                                          | Gender: -0.10<br>[0.12], p=0.4<br><br>Education: -0.06<br>[0.02], p<0.001 | Gender: 0.12<br>[0.07], p=0.1<br><br>Education: 0.02<br>[0.01], p=0.03 |
|                       | Age at presentation and symptom length                  | Gender: -0.11<br>[0.12], p=0.4<br><br>Education: -0.05<br>[0.02], p=0.005 | Gender: 0.11<br>[0.07], p=0.1<br><br>Education: 0.02<br>[0.01], p=0.03 |

|                          |                                        |                                                                           |                                                                            |
|--------------------------|----------------------------------------|---------------------------------------------------------------------------|----------------------------------------------------------------------------|
| Cross-sectional analyses | Age at presentation                    | Gender: -0.14<br>[0.16], p=0.4<br><br>Education: 0.34<br>[0.02], p<0.001  | Gender: 0.20<br>[0.10], p=0.04<br><br>Education: -0.10<br>[0.01], p<0.001  |
|                          | Age of onset                           | Gender: -0.20<br>[0.16], p=0.2<br><br>Education: 0.36<br>[0.02], p<0.001  | Gender: 0.24<br>[0.10], p=0.01<br><br>Education: -0.12<br>[0.01], p<0.001  |
|                          | Symptom length                         | Gender: -0.34<br>[0.15], p=0.02<br><br>Education: 0.34<br>[0.02], p<0.001 | Gender: 0.37<br>[0.09], p<0.001<br><br>Education: -0.12<br>[0.01], p<0.001 |
|                          | Age at presentation and symptom length | Gender: -0.32<br>[0.15], p=0.03<br><br>Education: 0.35<br>[0.02], p<0.001 | Gender: 0.35 [0.09]<br>p<0.001<br><br>Education: -0.11<br>[0.01], p<0.001  |

Supplementary table 1 Results from mutually-adjusted models for the effects of gender and education on outcomes. Longitudinal models were additionally adjusted for cognitive status at first visit (either MMSE for MMSE change outcomes, or CDR-SOB for CDR-SOB change outcomes), and ADC. Cross-sectional models were adjusted for ADC. Coefficients represent change in the outcome

for a 1-unit increase in the predictor [standard error], p value. For gender this represents the difference seen in women, compared with men.
